1 **Are We Seeing the Unseen of Human Trafficking? A Retrospective Secondary**  
2 **Analysis of the CTDC K-Anonymized Global Victim of Trafficking Data Pool**  
3 **in the Period 2010-2020**

4 Ala'a B. Al-Tammemi<sup>1\*</sup>, Asma Nadeem<sup>1</sup>, Laila Kutkut<sup>1</sup>, Manal Ali<sup>2</sup>, Khadijah Angawi<sup>3</sup>, Maram  
5 H. Abdallah<sup>4</sup>, Rana Abutaima<sup>5</sup>, Rasha Shoumar<sup>1</sup>, Rana Albakri<sup>1</sup>, Malik Sallam<sup>6,7,8</sup>

6 <sup>1</sup>Migration Health Division, International Organization for Migration (IOM), Amman, Jordan

7 <sup>2</sup>Epidemiological Surveillance Directorate, Jordan Center for Disease Control (JCDC), Amman,  
8 Jordan

9 <sup>3</sup>Department of Health Services and Hospital Administration, Faculty of Economics and  
10 Administration, King Abdulaziz University, Jeddah, Saudi Arabia

11 <sup>4</sup>Department of Biology and Biotechnology, Faculty of Science, The Hashemite University, Zarqa,  
12 Jordan

13 <sup>5</sup>Faculty of Pharmacy, Zarqa Private University, Zarqa, Jordan

14 <sup>6</sup>Department of Pathology, Microbiology and Forensic Medicine, School of Medicine, The  
15 University of Jordan, Amman, Jordan

16 <sup>7</sup>Department of Clinical Laboratories and Forensic Medicine, Jordan University Hospital, Amman,  
17 Jordan

18 <sup>8</sup>Department of Translational Medicine, Faculty of Medicine, Lund University, Malmö, Sweden

19

20 **\*Corresponding author:**

21 Ala'a B. Al-Tammemi, MD, MPH

22 IOM-UN Migration, Amman, Jordan

23 Email: aaltammemi@iom.int

24 Mobile: +962790364438

## ABSTRACT

25  
26  
27  
28  
29  
30  
31  
32  
33  
34  
35  
36  
37  
38  
39  
40  
41  
42  
43  
44  
45  
46  
47

**Background:** Human trafficking is considered a hidden global threat with unsubstantiated numbers despite the estimation of the presence of around 40.3 million victims worldwide. Human trafficking results in severe detrimental impacts on both mental and physical health. Given the sensitivity and negative consequences of human trafficking on the global system and victims, and considering the scarce research in this area, our current study aimed at describing the (i) Sociodemographic profiles of anonymized victims, (ii) Means of control, and (iii) Purpose of trafficking, utilizing the largest anonymized and publicly available dataset on victims of human trafficking.

**Methods:** This is a retrospective secondary analysis of the Counter-Trafficking Data Collaborative (CTDC) data pool in the period from 2010 to 2020. The utilized dataset is called the k-anonymized global victim of trafficking dataset, and it is considered the largest global dataset on victims of human trafficking. Data from the k-anonymized data pool were extracted and exported to Statistical Package for Social Sciences, SPSS® version 27.0 for Windows (IBM Corp. Version 27.0. Armonk, NY) for quality check and analysis using descriptive statistics.

**Results:** A total of 87003 victims of human trafficking were identified in the period from 2010 to 2020. The most age category encountered among victims was 9-17 years with around 10326 victims (11.9%), followed by 30-38 years with 8562 victims (9.8%). Females comprised 70% of the sample with 60938 victims. The United States (n=51611), Russia (n=4570), and the Philippines (n=1988) comprised the most countries of exploitation/trafficking. Additionally, the year 2019 witnessed the greatest number of victims registered for assistance by anti-trafficking agencies with around 21312 victims (24.5%). Concerning means of control, threats, psychological abuse,

48 restriction of the victim’s movement, taking the victim’s earnings, and physical abuse were the  
49 most reported means. Around 42685 victims (49.1%) reported sexual exploitation as the purpose  
50 of their trafficking, followed by forced labor with 18176 victims (20.9%).

51 **Conclusion:** Various means and methods can be used by traffickers to control the victims to be  
52 trafficked for many purposes, with sexual exploitation and forced labor being the most common  
53 ones. Global anti-trafficking efforts should be brought together in solidarity through utilizing the  
54 paradigm of protection of victims, prosecution of traffickers, prevention of trafficking, and inter-  
55 sectoral partnerships. Despite being a global concern with various reports that tried to capture the  
56 number of trafficked victims worldwide, human trafficking still has many unseen aspects that  
57 impose a significant challenge and adds to the global burden in combatting this threat.

58  
59 **Keywords:** CTDC; Human Trafficking; Migration; Sexual Exploitation; Forced Labour;  
60 Modern-day Slavery; Counter-trafficking

61

62

63

64

65

66

67

68

## 69        **1. BACKGROUND**

70            Generally, migration is defined as changing the place of habitual residence for a variety of  
71 reasons, and this can be temporarily or permanently, within the same country or through moving  
72 to another country (1,2). For simplification, migration can be classified into internal migration  
73 (within the same country), or external migration (moving to another country). Also, various  
74 geopolitical, technological, and environmental factors are shaping global migration (2). People  
75 migrate for a variety of reasons, some of which are man-made hazards (e.g., wars and armed  
76 conflicts, violation of human rights), natural/environmental disasters (earthquakes, floods,  
77 Tornados, epidemics, droughts), or other peaceful reasons such as studying, or looking for job  
78 opportunities (i.e., labor migration) (3). Statistically, around 3.6% of the world’s population are  
79 migrants in 2020 (i.e., people who migrated) and this corresponds to 281 million according to the  
80 most recent world migration report 2022 released by the International Organization for Migration  
81 (IOM) (2). Of the global 281 million migrants as of 2020, 135 million are female, and 146 are  
82 males, with around 169 million people migrating due to labor reasons (i.e., Labour migrants).

83            From a legal perspective, migration can be categorized into regular migration which is  
84 considered an authorized movement managed by various official authorities around the world, or  
85 irregular migration which corresponds to unauthorized movement through illegal ways such as  
86 smuggling and human trafficking (4). The term human trafficking is also known in the literature  
87 as trafficking in person (TIP) or modern-day slavery (5). The United Nations (UN) defines human  
88 trafficking as “*the recruitment, transportation, transfer, harbouring or receipt of persons, by*  
89 *means of the threat or use of force or other forms of coercion, of abduction, of fraud, of deception,*  
90 *of the abuse of power or of a position of vulnerability or of the giving or receiving of payments or*  
91 *benefits to achieve the consent of a person having control over another person, for the purpose of*

92 *exploitation*” (6,7). Also, the US National Human Trafficking Resource Centre (NHTRC) defines  
93 human trafficking as “*Human trafficking involves the use of force, fraud, or coercion to compel a*  
94 *person into commercial sex acts or labour or services against his or her will*” (8). Human  
95 trafficking is considered a crime and a severe multidimensional violation of human rights as well  
96 (9).

97 A model called the Actions - Means - Purpose model (The A-M-P model) describes how  
98 human trafficking occurs (9). Actions that may be taken by the perpetrator/trafficker include  
99 recruiting, harboring, obtaining, patronizing, soliciting, or transporting, while the means include  
100 force, coercion or fraud, and the purpose of trafficking is usually sex trafficking (commercial sex)  
101 or labor/service trafficking (8). Concerning the dimensional aspects of the means in the A-M-P  
102 model, the force could be through physical assault, confinement, or drugging the victim, fraud  
103 could be through false promises, fake travel documents, or false advertising, while coercion could  
104 be either physical (e.g., threatening to hurt someone, threatening by a weapon) or psychological  
105 (e.g., threats against the victim or the family, threats to be sent to jail) (9). Also, human trafficking  
106 as a concept differs from human smuggling as they are considered two distinct terms and crimes.  
107 While human smuggling requires the movement of victims across borders, human trafficking can  
108 occur without leaving the country (10). Although both concepts differ, smuggled humans have a  
109 high vulnerability for being victims of human trafficking too (10).

110 Trafficking of humans results in significant negative impacts on both mental and physical  
111 health due to the accompanying physical and psychological violence, in addition to poor living  
112 conditions (11). Various psychological responses have been reported by victims including  
113 posttraumatic stress symptomology, depression, anxiety, aggression, irritability, poor sleep,  
114 insomnia, avoidance and isolation, phobias and panic attacks, substance abuse, hopelessness,

115 distrust and fear of strangers, loss of interest in things, inability to plan for the future, fear of being  
116 permanently damaged, and fear of rejection (12).

117 In addition to the mental health impacts, human trafficking imposes detrimental  
118 consequences on victims' physical well-being too. Victims of human trafficking do not have  
119 sufficient access to quality medical care due to various reasons, with financial constraints and the  
120 victim's illegal status being the most common barriers (11). Moreover, victims are more prone to  
121 food deprivation and poor nutrition, memory loss, chronic pain, infectious diseases including viral,  
122 parasitic, and bacterial diseases (e.g., hepatitis, tuberculosis, sexually transmitted infections,  
123 contagious skin infestations), and occupational injuries (12).

124 Human trafficking is considered a hidden global problem with unsubstantiated numbers  
125 despite the presence of some global estimates and reports (13). In 2017, the International Labour  
126 Organization (ILO) estimated the presence of approximately 40.3 million victims of human  
127 trafficking, of whom 29.4 million were identified as victims of forced labor trafficking (6). Given  
128 the sensitivity, and negative consequences of human trafficking on the global system and victims,  
129 and considering the scarce research in this area, our current study aimed at analyzing part of the  
130 largest anonymized dataset on victims of human trafficking in the period 2010-2020. More  
131 specifically, we aimed at describing the following: (i) Sociodemographic profiles of anonymized  
132 victims, (ii) Means of control, and (iii) Purpose of trafficking. More details about the dataset and  
133 the analysed variables are described in the methods section of this paper.

134

135

136

## 137 2. METHODS

138

### 139 2.1 Study Design

140 This is a retrospective secondary analysis of a publicly available dataset on global victims  
141 of human trafficking.

142

### 143 2.2 An Overview of the Dataset and Data Contributors

144 The dataset used in our analysis is based on the Counter-Trafficking Data Collaborative  
145 (CTDC) which is a collaborative hub on human trafficking that provides data through collaboration  
146 between various counter-trafficking agencies including the IOM, Polaris, Recollectiv (formerly:  
147 the Liberty Shared), The Portuguese Observatory on Trafficking in Human Beings (OTSH), and  
148 the A21 (14). Additionally, Microsoft® and Tech Against Trafficking are the technology  
149 contributors. The CTDC initiative's donors are the U.S. Department of State Bureau of Population,  
150 Refugees, and Migration (PRM); the U.S. Department of Labour (DOL) through the International  
151 Labour Organization (ILO)'s Research to Action (RTA) project; the Global Fund to End Modern  
152 Slavery (GFEMS) under a cooperative agreement with the U.S. Department of State (DOS); the  
153 IOM Development Fund; and the Ministry of Foreign Affairs of the Netherlands (BZ) (14).

154 The created dataset by the CTDC initiative is called *the global victim of trafficking dataset*.  
155 It is considered the largest global dataset on victims of human trafficking. The required data are  
156 collected and updated by the contributing agencies and through the case management system (15).  
157 Due to the sensitivity of human trafficking data, individual-level data were protected at two stages,  
158 the first stage is through the elimination of all personal identifiers from the dataset, and the second  
159 stage which corresponds to a more advanced level of protection is through a mathematical

160 approach called k-anonymization (15). The global K-Anonymized dataset that has been used in  
161 our analysis comprises data on more than 156,000 victims of human trafficking from around 189  
162 countries from 2002 to 2021. This dataset used in our analysis is dated 15 July 2021, and it is  
163 publicly available to researchers and policymakers through the CTDC website (  
164 <https://www.ctdatacollaborative.org/dataset/global-k-anonymized-data-and-resources>).

165

### 166 **2.3 Study Population in the Analysed Period**

167 The authors of the present paper have decided to analyze the data for the period 2010 to 2020  
168 using the k-Anonymized global victim of trafficking dataset. In the mentioned period, 87003  
169 victims of human trafficking were identified.

170

### 171 **2.4 Description of the Analysed Variables**

172 2.4.1 *Sociodemographic Information:* This part comprised variables that are related to the year  
173 of registration (reflects the year in which the victim was identified and assisted by the  
174 counter-trafficking agency), data source (reflects the data collection method, whether  
175 through case management system or hotline service), gender (female, male, or  
176 transgender), age category in years (0-8, 9-17, 18-20, 21-23, 24-26, 27-29, 30-38, 39-47,  
177 48+), majority status at registration (reflects whether the victim was above 18 years or  
178 under 18 years of age at the time of registration and assistance by the concerned counter-  
179 trafficking agency; thus, categorized as adult or minor), majority Status at  
180 exploitation/trafficking (reflects whether the victim was above 18 years or under 18 years  
181 of age at the time of trafficking or exploitation; thus, categorized as adult or minor), the



182 victim's nationality or the country of origin, and country of trafficking/exploitation (the  
183 country where a victim is first identified and assisted). Concerning gender classifications,  
184 the IOM started to include gender (not sex at birth) including the transgender/non-  
185 Conforming category in the survey questionnaire starting in 2017.

186 2.4.2 *Means of Control:* In this part, the means of controlling human trafficking victims are  
187 collected, and it includes control by debt bondage, control by taking the  
188 remunerations/earnings of the victims, control through restrictions of victim's capability to  
189 access the needed daily living funds, control through threats, control through psychological  
190 abuse, control through physical abuse, control through sexual abuse, control through false  
191 promises, control through psychoactive substances, control through restriction of victim's  
192 freedom of movement, control through restriction of access to medical care, control  
193 through excessive working hours, control through restricting the victims' access to their  
194 children, control through threats of law enforcement and imprisonment, control through  
195 withholding necessities such as access to basic daily needs, and control through  
196 withholding or destroying official documents such as passports, work permits, or other  
197 legal or governmental documents. It is important to note that traffickers may use a  
198 combination of these means of control to exploit and enslave their victims.

199 2.4.3 *Purpose of Trafficking:* This part reflects the purpose of trafficking of the victims, and it  
200 includes, forced labor, sexual exploitation and services, combined sex and labor services,  
201 forced marriage (a marriage that was imposed on the individual under the threat of a  
202 penalty), forced military service (military service that was imposed on the individual under  
203 the threat of a penalty), organ removal, as well as slavery and similar practices. Regarding

204 sex services, this included prostitution, pornography, remote interactive services, and  
205 private sexual services.

206

## 207 **2.5 Data Analyses**

208 Data from the k-anonymized global victim of trafficking dataset were extracted and exported  
209 to Statistical Package for Social Sciences, SPSS® version 27.0 for Windows (IBM Corp. Version  
210 27.0. Armonk, NY) for quality check and analysis. Descriptive statistics were performed for  
211 categorical and numerical data. The age was presented in categories that were described in section  
212 2.4.1. Other categorical variables were presented as frequency counts and percentages. The dataset  
213 has many missing values in various parts which represent data that were not collected/missed/could  
214 not be retrieved. Missing values were reported where appropriate.

215

## 216 **2.6 Ethical Considerations**

217 The utilized dataset was already anonymized by the CTDC's technological support  
218 agencies using a two-step anonymization. Additionally, there was no required ethical approval  
219 for the utilization of the dataset as it is freely and publicly available to researchers and  
220 policymakers through the CTDC initiative website  
221 (<https://www.ctdatacollaborative.org/dataset/global-k-anonymized-data-and-resources>).

222

223

224

225 **3. RESULTS**

226

227 **3.1 Sociodemographic Profile of Victims**

228 A total of 87003 victims of human trafficking were identified in the period from 2010 to  
229 2020 within the utilized dataset. The most age category encountered among victims was 9-17 years  
230 with around 10326 victims (11.9%), followed by 30-38 years with 8562 victims (9.8%). 43656  
231 victims (50.2%) were identified as adults (aged 18 years and above) at the time of registration for  
232 assistance by anti-trafficking agencies, whereas 6675 victims (7.7%) were identified as adults at  
233 the time of trafficking or exploitation. Females comprised 70% of the sample with 60938 victims.  
234 Approximately, 60.5% of the trafficking data were obtained through hotline services. **Table 1**  
235 presents more details about the sociodemographic characteristics of the victims.

236

237

238

239

240

241

242

243

244

245

246 **Table 1.** Sociodemographic Profile of Victims in the Period 2010-2020 (n=87003)

| <b>Variable</b>                                    | <b>Category</b>            | <b>Frequency Count (n)</b> | <b>Percentage (%)</b> |
|----------------------------------------------------|----------------------------|----------------------------|-----------------------|
| <b>Age in Years</b>                                | 0-8                        | 1761                       | 2.0                   |
|                                                    | 9-17                       | 10326                      | 11.9                  |
|                                                    | 18-20                      | 4251                       | 4.9                   |
|                                                    | 21-23                      | 3570                       | 4.1                   |
|                                                    | 24-26                      | 3289                       | 3.8                   |
|                                                    | 27-29                      | 2766                       | 3.2                   |
|                                                    | 30-38                      | 8562                       | 9.8                   |
|                                                    | 39-47                      | 3589                       | 4.1                   |
|                                                    | 48+                        | 2202                       | 2.5                   |
|                                                    | Unknown                    | 46687                      | 53.7                  |
| <b>Gender</b>                                      | Female                     | 60938                      | 70.0                  |
|                                                    | Male                       | 19222                      | 22.1                  |
|                                                    | Transgender/Non-Conforming | 64                         | 0.1                   |
|                                                    | Unknown                    | 6779                       | 7.8                   |
| <b>Data Source</b>                                 | Case Management            | 34396                      | 39.5                  |
|                                                    | Hotline                    | 52607                      | 60.5                  |
| <b>Majority Status at Registration</b>             | Minor                      | 16939                      | 19.5                  |
|                                                    | Adult                      | 43656                      | 50.2                  |
|                                                    | Unknown                    | 26408                      | 30.3                  |
| <b>Majority Status at Exploitation/Trafficking</b> | Minor                      | 14182                      | 16.3                  |
|                                                    | Adult                      | 6675                       | 7.7                   |
|                                                    | Unknown                    | 66146                      | 76.0                  |

247

248 Concerning nationality or country of origin of victims, the top 10 countries -in descending

249 order- were the Philippines (n=11454), Ukraine (n=7478), U.S (n=6366), Moldova (n=4984),

250 Mexico (n=2382), Cambodia (n=2130), Indonesia (n=1513), Myanmar (n=1371), Nigeria

251 (n=1040), and Belarus (n=884). 43101 victims (49.5%) had an unknown country of origin (missing

252 value). On the other hand, the top 10 countries of exploitation/trafficking -in descending order-

253 were the U.S. (n=51611), Russia (n=4570), the Philippines (n=1988), Indonesia (n=1784),

254 Cambodia (n=1029), Mali (n=550), Thailand (n=505), Malaysia (n=501), Poland (n=485), and

255 Saudi Arabia (n=355). Missing values related to the country of exploitation were (19072; 21.9%).

256 The year 2019 witnessed the greatest number of victims registered for assistance with around

257 21312 victims (24.5%), followed by 2016 (n= 18836; 21.6%), and 2018 (n= 18265; 21.0%). See

258 **Figure 1.**

259

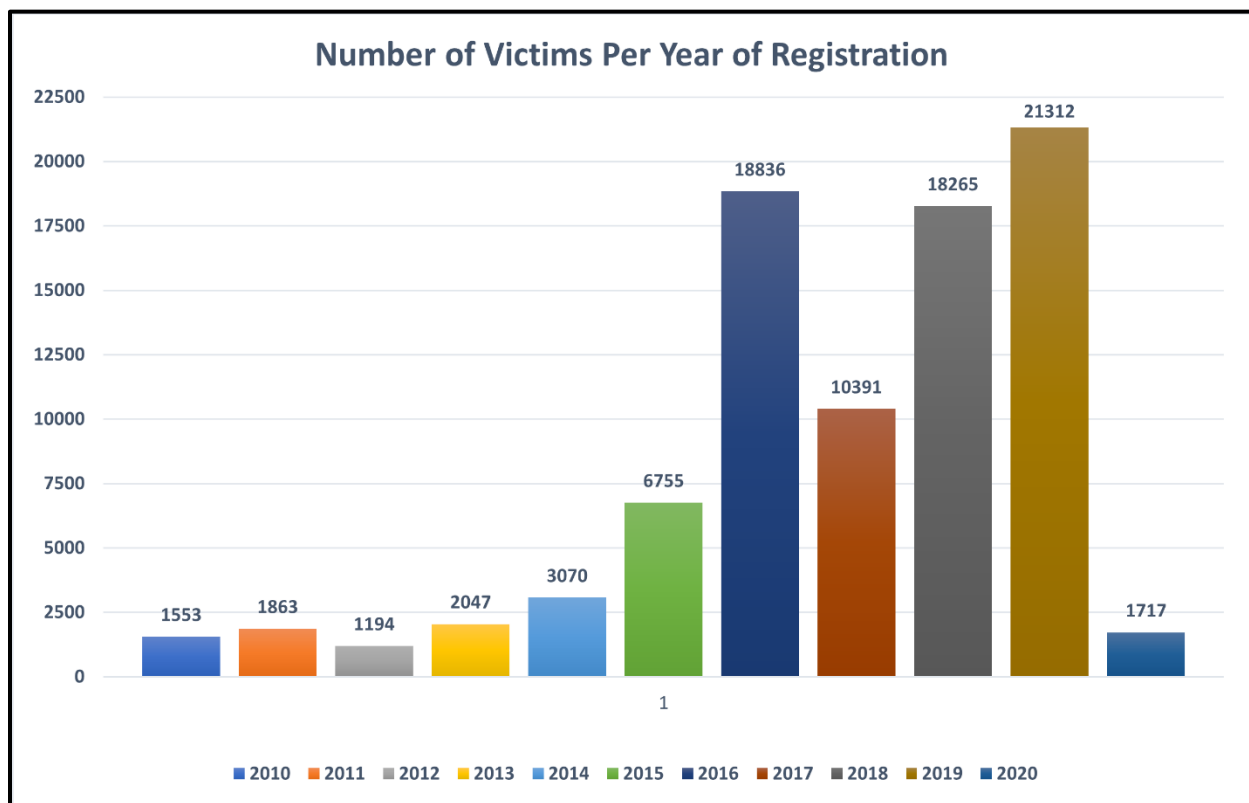

260

261 **Figure 1.** The number of victims per year of registration for assistance (n=87003).

262

263

264

265

266 **3.2 Means of Control**

267 The most reported means of control were threats (n=12343), psychological abuse  
268 (n=11980), restriction of the victim’s freedom of movement (n=11059), taking the victim’s  
269 remunerations/earnings (n=8588), physical abuse (n=8187), whereas the lowest reported means of  
270 control was restricting victims’ access to their children (n=360). **Table 2** shows more details about  
271 the reported means of control.

272

273 **Table 2.** Means of Control of Victims\*

| Mean of Control                                                        | Frequency Counts (n) | Percentage (%) |
|------------------------------------------------------------------------|----------------------|----------------|
| Threats                                                                | 12343                | 14.2           |
| Psychological abuse                                                    | 11980                | 13.8           |
| Restriction of victim’s freedom of movement                            | 11059                | 12.7           |
| Taking the victim’s remunerations/earnings                             | 8588                 | 9.9            |
| Physical abuse                                                         | 8187                 | 9.4            |
| Psychoactive substances                                                | 5969                 | 6.9            |
| Excessive working hours                                                | 5959                 | 6.8            |
| False promises                                                         | 5806                 | 6.7            |
| Withholding or destroying official documents or governmental documents | 4925                 | 5.7            |
| Withholding necessities such as access to basic daily needs            | 4813                 | 5.5            |
| Threats of law enforcement and imprisonment                            | 4618                 | 5.3            |
| Sexual abuse                                                           | 3956                 | 4.5            |

|                                                       |       |      |
|-------------------------------------------------------|-------|------|
| Debt Bondage                                          | 3877  | 4.4  |
| Restriction of access to medical care                 | 2121  | 2.4  |
| Restrictions on victim's access to daily living funds | 573   | 0.7  |
| Restricting victims' access to their children         | 360   | 0.4  |
| Others or Not Specified                               | 49636 | 57.1 |

274 \*Multiple means of control can be experienced by the victim

275

### 276 **3.3 Purpose of Trafficking**

277         Around 42685 victims (49.1%) reported sexual exploitation as the purpose of their  
278 trafficking, followed by forced labor with 18176 victims (20.9%). See **Figure 2** for more details.

279 Concerning types of sex work for those who experienced sexual exploitation as a purpose of  
280 trafficking were prostitution (n=13287; 15.3%), followed by pornography (n=1866; 2.1%), private  
281 sexual services (n=487; 0.6%), and remote interactive sex services (n=118; 0.1%).

282

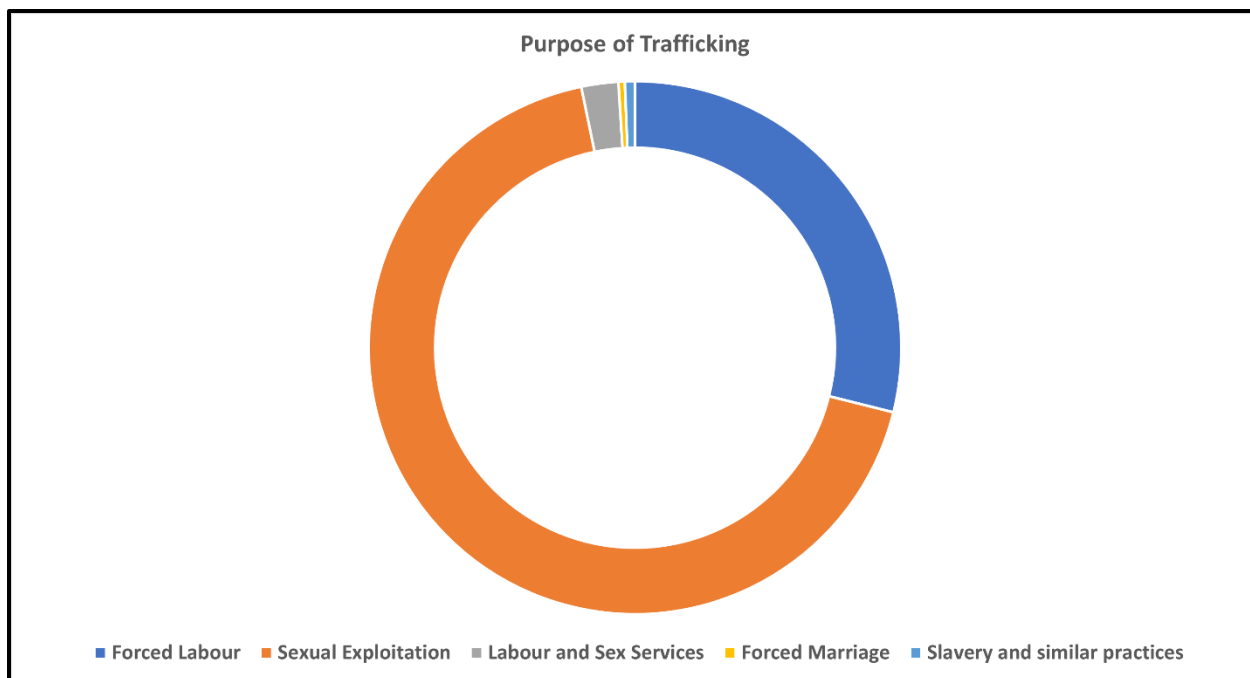

283

284 **Figure 2.** Purpose of Trafficking

285

286

#### 287 **4. DISCUSSION**

288 To the best of the authors' knowledge, this is the first scholarly attempt to analyze the  
289 largest publicly available data pool on human trafficking in the period 2010-2020, utilizing the K-  
290 Anonymized CTDC global victim of human trafficking dataset. The current analysis aimed to  
291 describe the anonymized sociodemographic profile of victims, means of control, and the purpose  
292 of trafficking. Our paper provides a brief and initial insight into a very sensitive and complicated  
293 topic that is of global concern. As mentioned earlier, global migration is affected and shaped by  
294 many geopolitical and socioeconomic factors (3,16). These factors may have a negative impact on  
295 regular migration (i.e., migration through a legal process) leading to an increased level of irregular  
296 migration (i.e., migration through illegal ways). Human trafficking or trafficking in person has  
297 been a global concern as it attracted public attention for the past 20 years due to its detrimental



298 and harmful impact on both the mental and physical well-being of victims, its violation of the  
299 victims' dignity, freedom and human rights, as well as its impact on global security (17,18). There  
300 are many hazards associated with human trafficking that can be linked to exploitation-related risks  
301 (e.g., abuse, occupational hazards, unsafe living conditions, and poor nutrition), or global health  
302 (vulnerability to infectious and non-communicable diseases, occupational injuries, financial  
303 insecurity, mental health burden, and hazardous labor cycles) (6).

304 To combat human trafficking, governments and organizations around the world have  
305 implemented a range of measures and strategies to prevent trafficking, protect victims, and  
306 prosecute traffickers (19). These efforts may include (i) legal frameworks through laws and  
307 regulations to criminalize human trafficking and provide protections for victims, (ii) prevention  
308 efforts through awareness campaigns, education programs, and efforts to disrupt the demand for  
309 exploitation, (iii) protection and support for victims through providing safe and secure housing,  
310 medical and mental health care, and legal assistance to victims of trafficking, (iii) prosecution of  
311 traffickers through law enforcement and efforts to strengthen the criminal justice system to better  
312 respond to trafficking, and (iv) international cooperation through working together and sharing  
313 information and resources (20,21). This may involve collaboration across borders and between  
314 different sectors, such as the law sector, social services, and non-governmental organizations  
315 (NGOs). Additionally, global anti-trafficking efforts may include intelligence and information  
316 sharing through gathering and sharing information about human trafficking cases, trends, and  
317 networks, as well as using this information to inform law enforcement and victim services efforts  
318 (20).

319

320           Some examples of global anti-trafficking initiatives and laws are, a collaboration between  
321 the IOM, the European Union (EU), the United Nations Office on Drugs and Crime (UNODC)  
322 was established to counteract human trafficking through The Global Action against Trafficking in  
323 Persons and the Smuggling of Migrants - Asia and the Middle East (GLO.ACT Asia and the  
324 Middle East) in the period 2015-2019 (22). Additionally, the UNODC has set a Global Initiative  
325 to Fight Human Trafficking (UN.GIFT) which was implemented in 2007 with the main objective  
326 of fighting human trafficking through raising public awareness, strengthening preventive  
327 measures, supporting and protecting victims, anti-trafficking law enforcement, implementing  
328 international commitment, strengthening partnerships, and providing funds for necessary services  
329 and initiatives (23). Moreover, various anti-trafficking laws were established in various regions  
330 such as the 2006 Ouagadougou Action Plan to Combat Trafficking in Human Beings in the African  
331 Union, the Plan of Action Against Trafficking in Persons especially Women and Children - 2015,  
332 the Convention Against Trafficking in Persons, Especially Women and Children - 2015, and the  
333 Declaration Against Trafficking in Persons, Particularly Women and Children - 2004 which were  
334 established by the association of southeast Asian nations (24). The EU has been also active in  
335 implementing various measures to fight human trafficking through the 2012-2016 EU Strategy  
336 towards the Eradication of Trafficking in Human Beings, and 2011 Directive 2011/36/EU on  
337 Combating and Preventing Trafficking in Human Beings and Protecting its Victims. Furthermore,  
338 Arab states have joined the global anti-trafficking efforts through the 2012 Comprehensive Arab  
339 Strategy for Combating Trafficking in Human Beings, the 2010 Arab Initiative to Combat  
340 Trafficking in Persons, and the 2008 Arab Framework Act on Combating Trafficking in Persons  
341 (24). The Americas as well have paid tremendous attention to the issue of human trafficking  
342 through the 2018 Hemispheric Efforts against Trafficking in Persons “Declaration of Mexico”, the

343 2014 Inter-American Declaration against Trafficking in Persons, and the 2010-2014 Working Plan  
344 to Combat Trafficking in Persons in the Western Hemisphere (24).

345 Looking at how various countries and nations are standing against human trafficking  
346 through various laws and initiatives, it is important to stress the point that anti-trafficking efforts  
347 are challenging due to the many complexities surrounding this issue. The UN has classified human  
348 trafficking as the third most profitable crime globally (25). Also, human trafficking does not only  
349 have economic perspectives but also a public health one. The economic, social, and health impacts  
350 of human trafficking are still not thoroughly looked at and researched. According to recent  
351 statistics, human trafficking was estimated to be a \$150 billion industry (26). As mentioned  
352 previously, the ILO revealed that around 40 million people were victimized through trafficking in  
353 persons (6). Additionally, the same ILO statistics reported that most victims are females, which is  
354 also similar to what was found in our analysis. Also, the findings of our present study are consistent  
355 with the 2016 UNODC report which revealed that the majority of trafficked victims were women,  
356 girls, and younger children and accounted for 71% (27). Human trafficking is affecting various  
357 populations regardless of age, gender, and nationality. Children/minors are also in danger of this  
358 crime as they can be trafficked for forced labor, forced military service, and sex trafficking (28).  
359 In addition, certain populations have high vulnerability to being victimized through human  
360 trafficking such as minors, victims of child sexual abuse, foreign nationals, persons with extreme  
361 poverty, and lesbian, gay, bisexual, transgender, queer, and others (LGBTQ+) individuals (28).

362 To successfully combat human trafficking, anti-trafficking efforts should be brought  
363 together in solidarity through inter-governmental and intersectoral partnerships involving  
364 governmental organizations, NGOs, the private sector, and communities (29). Tackling a global  
365 threat like human trafficking does not have a smooth pathway. Therefore, a multi-faceted approach

366 is required such as the 4Ps paradigm which includes: Protection, Prosecution, Prevention, and  
367 Partnerships is considered an essential approach to combat human trafficking (30).

368 Our study has limitations that should be taken into consideration while interpreting the  
369 findings. The CTDC K-Anonymized dataset has many missing values which may change some  
370 statistical figures if these missing values were collected. Additionally, there is a possibility of recall  
371 bias that impacted the collected data and may have led to the missing values as victims of human  
372 trafficking might suffer from psychological traumas that negatively affect their ability to recall  
373 events. Another limitation to this study could be that the numbers of those exposed to human  
374 trafficking are underestimated and underreported so we cannot assume that the results are  
375 generalizable to the population of global victims or international migrants. Nevertheless, our  
376 findings provide an initial insight into some statistics related to human trafficking utilizing the  
377 CTDC collaborative hub, and we encourage further research in this field with the involvement of  
378 a longer period of analysis and utilizing more variables as well.

379

## 380 **5. CONCLUSION**

381 Human trafficking has detrimental consequences on the physical and psychological health  
382 of victims. Various means and methods can be used by traffickers to control the victims to be  
383 trafficked for many purposes with sexual exploitation and forced labor being the most common  
384 ones. Global anti-trafficking efforts should be brought together in solidarity through utilizing the  
385 paradigm of protection of victims, prosecution of traffickers, prevention of trafficking, and inter-  
386 sectoral partnerships. Despite being a global concern with various reports that tried to estimate the

387 number of trafficked victims globally, human trafficking still has many unseen aspects that impose  
388 a significant challenge and adds to the global burden in combatting this worldwide threat.

389

390

## 391 **DECLARATIONS**

392 **Competing interests:** The authors declare that they have no competing interests.

393 **Acknowledgments:** We would like to thank the CTDC initiative and collaborators for providing  
394 the anonymized dataset publicly to researchers and policymakers.

395 **Author Contributions:** Conceptualization: ABA; Methodology ABA; Data Analysis: ABA;  
396 Supervision: ABA, AN, LK, MS. Writing – original draft preparation: ABA; Writing – literature  
397 review, critical review, and editing: ABA, AN, LK, MA, KA, MHA, RA, RS, RA, MS;  
398 Visualization: ABA. All authors have significantly contributed to this manuscript. All authors have  
399 read and approved the submission of the manuscript.

400 **Funding:** This research received no specific grant from any funding agency in the public,  
401 commercial, or not-for-profit sectors.

402 **Availability of data and materials:** The dataset analyzed in the current study is freely and  
403 publicly available through this link [https://www.ctdatacollaborative.org/dataset/global-k-](https://www.ctdatacollaborative.org/dataset/global-k-anonymized-data-and-resources)  
404 [anonymized-data-and-resources](https://www.ctdatacollaborative.org/dataset/global-k-anonymized-data-and-resources)

405 **Ethics approval and consent to participate:** Not required

406 **Disclaimer:** What is expressed in this article is solely those of the authors and does not necessarily  
407 represent those of their affiliated organizations.

408 **REFERENCES**

- 409 1. International Organization for Migration (IOM). IOM Definition of “Migrant” [Internet].  
410 [Online]. 2022 [cited 2022 Dec 16]. Available from: <https://www.iom.int/about-migration>
- 411 2. Mcauliffe M, Triandafyllidou A (eds. . World Migration Report 2022 [Internet]. Geneva;  
412 2021. Available from: <https://publications.iom.int/books/world-migration-report-2022>
- 413 3. Castelli F. Drivers of migration: Why do people move? *J Travel Med.* 2018;25(1):1–7.
- 414 4. International Organization for Migration (IOM). Key Migration Terms [Internet].  
415 [Online]. 2022 [cited 2022 Dec 16]. Available from: <https://www.iom.int/key-migration-terms#:~:text=Border management – The administration of,identifying the victims of such>
- 417 5. Altun S, Abas M, Zimmerman C, Howard LM, Oram S. Mental health and human  
418 trafficking: responding to survivors’ needs. *BJPsych Int.* 2017;14(1):21–3.
- 419 6. Zimmerman C, Kiss L. Human trafficking and exploitation: A global health concern.  
420 *PLoS Med.* 2017;14(11):1–11.
- 421 7. United Nations. United Nations General Assembly. Optional Protocol to Prevent,  
422 Suppress and Punish Trafficking in Persons, Especially Women and Children,  
423 Supplementing the United Nations Convention Against Transnational Organized Crime  
424 [Internet]. [Online]. 2000 [cited 2022 Dec 16]. Available from:  
425 [https://treaties.un.org/Pages/ViewDetails.aspx? src=IND&mtdsg\\_no=XVIII-12-](https://treaties.un.org/Pages/ViewDetails.aspx?src=IND&mtdsg_no=XVIII-12-a&chapter=18&lang=en)  
426 [a&chapter=18&lang=en.](https://treaties.un.org/Pages/ViewDetails.aspx? src=IND&mtdsg_no=XVIII-12-a&chapter=18&lang=en)
- 427 8. National Human Trafficking Resource Center (NHTRC). Understanding the Definition of  
428 Human Trafficking: The Action-Means-Purpose Model [Internet]. [Online]. 2012 [cited

- 429 2022 Dec 16]. Available from: [https://humantraffickinghotline.org/resources/actions-](https://humantraffickinghotline.org/resources/actions-means-purpose-amp-model)  
430 means-purpose-amp-model
- 431 9. US Department of Defense. Trafficking in Persons [Internet]. [Online]. 2022 [cited 2022  
432 Dec 16]. Available from: <https://ctip.defense.gov/What-is-TIP/>
- 433 10. US Department of Justice. The National Action Plan to Combat Human Trafficking  
434 (NAP) [Internet]. [Online]. 2021 [cited 2022 Dec 30]. Available from:  
435 [https://www.whitehouse.gov/wp-content/uploads/2021/12/National-Action-Plan-to-](https://www.whitehouse.gov/wp-content/uploads/2021/12/National-Action-Plan-to-Combat-Human-Trafficking.pdf)  
436 Combat-Human-Trafficking.pdf
- 437 11. Seminar on Health and Migration - IOM. Trafficking in human beings and health  
438 implications [Internet]. [Online]. 2004 [cited 2022 Dec 26]. Available from:  
439 [https://www.iom.int/sites/g/files/tmzbd1486/files/jahia/webdav/site/myjahiasite/shared/sha-](https://www.iom.int/sites/g/files/tmzbd1486/files/jahia/webdav/site/myjahiasite/shared/shared/mainsite/microsites/IDM/workshops/Health_and_Migration_09110604/related/docs/background.pdf)  
440 red/mainsite/microsites/IDM/workshops/Health\_and\_Migration\_09110604/related  
441 docs/background.pdf
- 442 12. Office for Victims of Crime. Human Trafficking [Internet]. [Online]. 2012 [cited 2022  
443 Dec 30]. Available from:  
444 [http://www.ncdsv.org/images/OVCTTAC\\_HumanTraffickingResourcePaper\\_2012.pdf](http://www.ncdsv.org/images/OVCTTAC_HumanTraffickingResourcePaper_2012.pdf)
- 445 13. Barrick K, Lattimore PK, Pitts W, Zhang SX. Indicators of Labor Trafficking Among  
446 North Carolina Migrant Farmworkers [Internet]. Washington, DC; 2013. Available from:  
447 <https://www.ojp.gov/pdffiles1/nij/grants/244204.pdf>
- 448 14. The International Organization for Migration (IOM). CTDC Data Contributors [Internet].  
449 [Online]. 2022 [cited 2022 Dec 23]. Available from:  
450 <https://www.ctdatacollaborative.org/about/partners>

- 451 15. The International Organization for Migration (IOM). What is the Counter-Trafficking  
452 Data Collaborative? [Internet]. [Online]. 2022 [cited 2022 Dec 23]. Available from:  
453 <https://www.ctdatacollaborative.org/faqs>
- 454 16. Wong PH, Celbis MG. Human Rights, Income and International Migration. *Int Migr.*  
455 2019;57(3):98–114.
- 456 17. Dottridge M. Global Trafficking Prevalence Data Distorts Efforts to Stop Patterns of  
457 Human Trafficking. *Anti-Trafficking Rev.* 2017;(8).
- 458 18. Weitzer R. New Directions in Research on Human Trafficking. *Ann Am Acad Pol Soc*  
459 *Sci.* 2014;653(1):6–24.
- 460 19. Papanicolaou G. The sex industry, human trafficking and the global prohibition regime: A  
461 cautionary tale from Greece. *Trends Organ Crime.* 2008;11(4):379–409.
- 462 20. White K, Thompson PS, McCoy EF, Hussemann J, Adams W, Taylor R. Collaboration  
463 and Challenges in Antitrafficking Task Forces: Lessons Learned from an Evaluation of the  
464 Enhanced Collaborative Model Task Forces to Combat Human Trafficking [Internet].  
465 Washington, DC; 2022. Available from:  
466 [https://www.urban.org/research/publication/collaboration-and-challenges-antitrafficking-](https://www.urban.org/research/publication/collaboration-and-challenges-antitrafficking-task-forces)  
467 [task-forces](https://www.urban.org/research/publication/collaboration-and-challenges-antitrafficking-task-forces)
- 468 21. Macy RJ, Eckhardt A, Wretman CJ, Hu R, Kim J, Wang X, et al. Developing Evaluation  
469 Approaches for an Anti-Human Trafficking Housing Program. *Am J Eval.* 2022 Jun  
470 16;43(4):539–58.
- 471 22. United Nations Office on Drugs and Crime. GLO.ACT Asia and the Middle East



- 472 [Internet]. [Online]. 2022 [cited 2022 Dec 25]. Available from:  
473 <https://www.unodc.org/unodc/en/human-trafficking/glo-act2/overview.html>
- 474 23. United Nations Office on Drugs and Crime. Global Initiative to Fight Human Trafficking  
475 [Internet]. [Online]. 2007 [cited 2022 Dec 25]. Available from:  
476 [https://www.unodc.org/pdf/gift\\_brochure.pdf](https://www.unodc.org/pdf/gift_brochure.pdf)
- 477 24. The Warnath Group. Global Collection of Human Trafficking Laws [Internet]. [Online].  
478 2022 [cited 2022 Dec 25]. Available from: <https://www.warnathgroup.com/laws/>
- 479 25. Winterdyk J, Reichel P. Introduction to Special Issue: Human Trafficking: Issues and  
480 Perspectives. *Eur J Criminol*. 2010 Jan 1;7(1):5–10.
- 481 26. Niethammer C. Cracking The \$150 Billion Business Of Human Trafficking [Internet].  
482 [Online]. 2020 [cited 2022 Dec 26]. Available from:  
483 [https://www.forbes.com/sites/carmenniethammer/2020/02/02/cracking-the-150-billion-](https://www.forbes.com/sites/carmenniethammer/2020/02/02/cracking-the-150-billion-business-of-human-trafficking/?sh=258edfd24142)  
484 [business-of-human-trafficking/?sh=258edfd24142](https://www.forbes.com/sites/carmenniethammer/2020/02/02/cracking-the-150-billion-business-of-human-trafficking/?sh=258edfd24142)
- 485 27. United Nations. Report: Majority of trafficking victims are women and girls; one-third  
486 children [Internet]. [Online]. 2016 [cited 2022 Dec 26]. Available from:  
487 [https://www.un.org/sustainabledevelopment/blog/2016/12/report-majority-of-trafficking-](https://www.un.org/sustainabledevelopment/blog/2016/12/report-majority-of-trafficking-victims-are-women-and-girls-one-third-children/)  
488 [victims-are-women-and-girls-one-third-children/](https://www.un.org/sustainabledevelopment/blog/2016/12/report-majority-of-trafficking-victims-are-women-and-girls-one-third-children/)
- 489 28. Association of Women’s Health Obstetric and Neonatal Nurses. Human Trafficking. *Nurs*  
490 *Womens Health*. 2022;26(6):e1–3.
- 491 29. Dearnley R. Prevention, Proseccion and Protection - Human Trafficking [Internet].  
492 [Online]. 2022 [cited 2022 Dec 25]. Available from:

493 <https://www.un.org/en/chronicle/article/prevention-prosecution-and-protection-human->  
494 trafficking

495 30. US Department of State. 3Ps: Prosecution, Protection, and Prevention [Internet]. [Online].  
496 2022 [cited 2022 Dec 25]. Available from: <https://www.state.gov/3ps-prosecution->  
497 [protection-and-prevention/#:~:text=The “3P” paradigm—prosecution,world to combat](https://www.state.gov/3ps-prosecution-protection-and-prevention/#:~:text=The%20%223P%22%20paradigm%20%E2%80%94%20prosecution,world%20to%20combat)  
498 human trafficking.

499
